# Supplementary material
Source: publisher figshare collection journal article supplement (https://karger.figshare.com/articles/dataset/_/4729756)
Supplement: Supplementary file 1 [file 1 › PSP454928_sm1.pdf]

# **EAWWE: Examination of Anomalous World Experience** **Appendix A (Scoring sheet version)**

## *EAWWE Items and Subtypes: Key List and Scoring Sheet<sup>i</sup>*

### **Possible item (e.g., 1.1) and subtype (e.g., 1.1.1) scores**

2 = Definitely present

1 = Possibly present

0 = Definitely not present

*Note: Interviewer should score items and subtypes as 0, 1, or 2. Please see the General Guidelines for Conducting the Interview section of the EAWWE: Examination of Anomalous World Experience (published in Psychopathology 2017) for additional information on conducting and scoring the interview.*

| <b>EAWWE Item/Subtype</b> | <b>Score</b> | <b>Notes</b>                                                   |
|---------------------------|--------------|----------------------------------------------------------------|
| <b>1</b>                  |              | <b>Space and Objects</b>                                       |
| 1.1                       |              | <i>Abnormal intensity or persistence of visual perceptions</i> |
| 1.1.1                     |              | Increase in intensity of visual perceptions*                   |
| 1.1.2                     |              | Decrease in intensity of visual perceptions*                   |
| 1.1.3                     |              | Recurrence or prolongation of visual stimuli                   |
| 1.2                       |              | <i>Blindness or partial blindness</i>                          |
| 1.2.1                     |              | Blurred vision*                                                |
| 1.2.2                     |              | Partial seeing                                                 |
| 1.2.3                     |              | Transitory blindness                                           |
| 1.3                       |              | <i>Disturbances in veridicality of visual perceptions*</i>     |
| 1.3.1                     |              | Visual illusions*                                              |
| 1.3.2                     |              | Visual hallucinations*                                         |
| 1.3.3                     |              | Visual pseudohallucinations*                                   |
| 1.4                       |              | <i>Visual fragmentation</i>                                    |
| 1.4.1                     |              | Object fragmentation                                           |

**EAWWE: Examination of Anomalous World Experience**  
**Appendix A (Scoring sheet version)**

| EAWWE Item/Subtype                                                            | Score | Notes |
|-------------------------------------------------------------------------------|-------|-------|
| 1.4.2 Break-up of a scene                                                     |       |       |
| 1.4.3 Captivation of attention by isolated details                            |       |       |
| 1.5 <i>Disorganization or disturbed object stability</i>                      |       |       |
| 1.5.1 Disorganized object contours                                            |       |       |
| 1.5.2 Loss of perceptual stability                                            |       |       |
| 1.6 <i>Changes in quality, size, or shape of visual perceptions</i>           |       |       |
| 1.6.1 Changes in color of visual perceptions                                  |       |       |
| 1.6.2 Micropsia/macropsia                                                     |       |       |
| 1.6.3 Dysmegalopsia                                                           |       |       |
| 1.6.4 Metamorphopsia                                                          |       |       |
| 1.6.5 Other distortions                                                       |       |       |
| 1.7 <i>Disturbances of perceptual distance or object juxtaposition</i>        |       |       |
| 1.7.1 Objects seem closer or farther away*                                    |       |       |
| 1.7.2 Disturbance of relative spatial relationship (juxtaposition) of objects |       |       |
| 1.7.3 General disturbances in estimation of distance                          |       |       |
| 1.8 <i>Distorted experiences of space</i>                                     |       |       |
| 1.8.1 Diminished perspectival orientation                                     |       |       |

**EAWWE: Examination of Anomalous World Experience**  
**Appendix A (Scoring sheet version)**

| <b>EAWWE Item/Subtype</b> | <b>Score</b> | <b>Notes</b>                                                     |
|---------------------------|--------------|------------------------------------------------------------------|
| 1.8.2                     |              | Loss of topographical orientation                                |
| 1.8.3                     |              | Loss of spatial integrity or structure                           |
| 1.8.4                     |              | Loss of dimensionality                                           |
| 1.8.5                     |              | Experience of infinite space                                     |
| 1.8.6                     |              | Figure/ground reversal                                           |
| 1.8.7                     |              | Affective experience of space*                                   |
| 1.9                       |              | <i>Abnormal intensity or persistence of auditory perceptions</i> |
| 1.9.1                     |              | Increases in intensity of auditory perceptions*                  |
| 1.9.2                     |              | Decreases in intensity of auditory perceptions*                  |
| 1.9.3                     |              | Heightened awareness of background auditory sensations           |
| 1.9.4                     |              | Recurrence or prolongation of auditory stimuli                   |
| 1.10                      |              | <i>Disturbances in veridicality of auditory perceptions*</i>     |
| 1.10.1                    |              | Auditory illusions*                                              |
| 1.10.2                    |              | Auditory hallucinations*                                         |
| 1.10.3                    |              | Auditory pseudohallucinations*                                   |
| 1.11                      |              | <i>Other changes in quality of auditory perceptions</i>          |
| 1.12                      |              | <i>Problems localizing sounds</i>                                |
| 1.13                      |              | <i>Disturbances of other senses*</i>                             |

**EAWWE: Examination of Anomalous World Experience**  
**Appendix A (Scoring sheet version)**

| <b>EAWWE Item/Subtype</b> | <b>Score</b> | <b>Notes</b>                                                           |
|---------------------------|--------------|------------------------------------------------------------------------|
| 1.13.1                    |              | Tactile disturbance*                                                   |
| 1.13.2                    |              | Gustatory disturbance*                                                 |
| 1.13.3                    |              | Olfactory disturbance*                                                 |
| 1.14                      |              | <i>Synaesthesia or abnormal concomitant perception*</i>                |
| 1.15                      |              | <i>Splitting-off or isolation of sensory perceptions</i>               |
| 1.16                      |              | <i>Disturbances in recognizing or identifying object of perception</i> |
| 1.17                      |              | <i>Loss of boundaries with the physical world</i>                      |
| <b>2</b>                  |              | <b>Time and Events</b>                                                 |
| 2.1                       |              | <i>Time or movements appear to change speed</i>                        |
| 2.1.1                     |              | Time or movements seem speeded up*                                     |
| 2.1.2                     |              | Time or movements seem slowed down*                                    |
| 2.1.3                     |              | Time or movements seem both speeded up and slowed down                 |
| 2.2                       |              | <i>Discrepancy between internal and external time*</i>                 |
| 2.2.1                     |              | Internal time slower than world time*                                  |
| 2.2.2                     |              | Internal time faster than world time*                                  |
| 2.3                       |              | <i>Disruption of dynamic organization of time</i>                      |
| 2.3.1                     |              | Time feels as though stopped, static, infinite, disappeared            |
| 2.3.2                     |              | Time as disjointed or fragmented                                       |

**EAWWE: Examination of Anomalous World Experience**  
**Appendix A (Scoring sheet version)**

| <b>EAWWE Item/Subtype</b> | <b>Score</b> | <b>Notes</b>                                                   |
|---------------------------|--------------|----------------------------------------------------------------|
| 2.3.3                     |              | Disorientation in time                                         |
| 2.3.4                     |              | Feeling limited to or isolated within present moment           |
| 2.3.5                     |              | Various bizarre experiences of time                            |
| 2.4                       |              | <i>Disturbed anticipation</i>                                  |
| 2.4.1                     |              | Perpetual anticipation                                         |
| 2.4.2                     |              | Constant surprise due to inability to anticipate future events |
| 2.4.3                     |              | Feeling that “anything could happen”                           |
| 2.4.4                     |              | Protention (future directedness) collapses                     |
| 2.5                       |              | <i>Disturbed awareness of the expected future*</i>             |
| 2.5.1                     |              | Future seems nonexistent*                                      |
| 2.5.2                     |              | Future seems unimportant or irrelevant*                        |
| 2.5.3                     |              | Future seems threatening*                                      |
| 2.5.4                     |              | Premonitions*                                                  |
| 2.6                       |              | <i>Disturbed experience of memories or past</i>                |
| 2.6.1                     |              | Past seems cut off*                                            |
| 2.6.2                     |              | Past seems vague or obscure*                                   |
| 2.6.3                     |              | Past disappears or seems nonexistent*                          |
| 2.6.4                     |              | Past seems accelerated*                                        |

**EAWE: Examination of Anomalous World Experience**  
**Appendix A (Scoring sheet version)**

| EAWE Item/Subtype | Score | Notes                                                                            |
|-------------------|-------|----------------------------------------------------------------------------------|
| 2.6.5             |       | Past seems slower*                                                               |
| 2.6.6             |       | Intrusiveness of the past*                                                       |
| 2.6.7             |       | Erosion of distinction between past and present*                                 |
| 2.6.8             |       | Past seems disjointed                                                            |
| <b>3</b>          |       | <b>Other Persons</b>                                                             |
| 3.1               |       | <i>Lack of social understanding or interpersonal attunement (hypoattunement)</i> |
| 3.1.1             |       | Loss of social common sense                                                      |
| 3.1.2             |       | Bodily/proprioceptive loss of attunement                                         |
| 3.1.3             |       | Specific difficulty understanding nonverbal communication                        |
| 3.2               |       | <i>Sense of remoteness from others*</i>                                          |
| 3.3               |       | <i>Alienated/intellectual strategies for understanding others</i>                |
| 3.3.1             |       | Alienated scrutinizing of others' behavior                                       |
| 3.3.2             |       | Algorithmic approach to social understanding/interaction                         |
| 3.4               |       | <i>Sense of inferiority, criticism, mistrust*</i>                                |
| 3.4.1             |       | Feelings of self-consciousness, self-criticism*                                  |
| 3.4.2             |       | Feelings of social paranoia or social anxiety*                                   |
| 3.4.3             |       | Pervasive mistrust of others*                                                    |
| 3.5               |       | <i>Torment or distress due to generalized social insecurity</i>                  |

**EAWWE: Examination of Anomalous World Experience**  
**Appendix A (Scoring sheet version)**

| <b>EAWWE Item/Subtype</b> | <b>Score</b> | <b>Notes</b>                                 |
|---------------------------|--------------|----------------------------------------------|
| 3.6                       |              | <i>Interference by voices*</i>               |
| 3.7                       |              | <i>Disturbance of self-other demarcation</i> |
| 3.7.1                     |              | Hyperattunement                              |
| 3.7.2                     |              | Unusual influence over others                |
| 3.7.3                     |              | Pathological openness                        |
| 3.7.4                     |              | Experiences of being controlled              |
| 3.7.5                     |              | Merging or fluid boundaries                  |
| 3.7.6                     |              | Universal merging with others*               |
| 3.7.7                     |              | Uncertain personal identity/attitudes*       |
| 3.7.8                     |              | Uncertain physical boundaries                |
| 3.7.9                     |              | Experience of being imitated                 |
| 3.8                       |              | <i>Difficulties with the gaze</i>            |
| 3.8.1                     |              | Intrusiveness of gaze of the other           |
| 3.8.2                     |              | Feeling of exposure through one's own eyes   |
| 3.8.3                     |              | Intrusiveness of one's own gaze              |
| 3.8.4                     |              | Dehumanization of the eyes of others         |
| 3.8.5                     |              | Eyes as cosmic portals                       |
| 3.8.6                     |              | Unspecific uneasiness with the gaze          |

**EAWWE: Examination of Anomalous World Experience**  
**Appendix A (Scoring sheet version)**

| <b>EAWWE Item/Subtype</b> | <b>Score</b> | <b>Notes</b>                                                                  |
|---------------------------|--------------|-------------------------------------------------------------------------------|
| 3.9                       |              | <i>Depersonalization of others</i>                                            |
| 3.9.1                     |              | People seem dead*                                                             |
| 3.9.2                     |              | People seem unreal/false/illusory                                             |
| 3.9.3                     |              | People seem mechanical                                                        |
| 3.10                      |              | <i>Persons dominated by single characteristic</i>                             |
| 3.11                      |              | <i>Heightened intensity, aliveness, or reality of others*</i>                 |
| 3.12                      |              | <i>Changes in quality or tone of others' appearance</i>                       |
| 3.12.1                    |              | People seem familiar in a strange way                                         |
| 3.12.2                    |              | People seem unfamiliar in a strange way                                       |
| 3.12.3                    |              | People seem disguised*                                                        |
| 3.12.4                    |              | People seem threatening in a strange way*                                     |
| 3.12.5                    |              | General/unspecified changes in physical appearance of others                  |
| 3.13                      |              | <i>People seem as if communicating something special (beyond the obvious)</i> |
| 3.13.1                    |              | Paranoid significance*                                                        |
| 3.13.2                    |              | Grandiose significance*                                                       |
| 3.13.3                    |              | Metaphysical significance                                                     |
| 3.13.4                    |              | Unknown/unstatable significance                                               |

**EAWWE: Examination of Anomalous World Experience**  
**Appendix A (Scoring sheet version)**

| <b>EAWWE Item/Subtype</b> | <b>Score</b> | <b>Notes</b>                                                            |
|---------------------------|--------------|-------------------------------------------------------------------------|
| 3.14                      |              | <i>Anomalous behavioral/attitudinal responses to others</i>             |
| 3.14.1                    |              | Active withdrawal*                                                      |
| 3.14.2                    |              | Oppositional/rebellious behavior*                                       |
| 3.14.3                    |              | Social disinhibition*                                                   |
| 3.14.4                    |              | Compulsive interpersonal harmony*                                       |
| 3.14.5                    |              | Extreme compliance                                                      |
| 3.14.6                    |              | Compulsive clownery/entertainment of others*                            |
| <b>4</b>                  |              | <b>Language</b>                                                         |
| 4.1                       |              | <i>Basic disruptions of standard verbal comprehension</i>               |
| 4.1.1                     |              | Meaning/sound dissociation                                              |
| 4.1.2                     |              | Distraction via semantic possibilities                                  |
| 4.1.3                     |              | Distraction by individual words                                         |
| 4.1.4                     |              | Unspecified difficulty understanding                                    |
| 4.2                       |              | <i>Difficulty understanding emotional/expressive aspects of speech*</i> |
| 4.3                       |              | <i>Specific changes in standard feel or meaning of words</i>            |
| 4.3.1                     |              | Focus on sound or appearance of words or phrases*                       |
| 4.3.2                     |              | Unconventional semantic determination                                   |
| 4.3.3                     |              | Words seems arbitrary/absurd                                            |

**EAWWE: Examination of Anomalous World Experience**  
**Appendix A (Scoring sheet version)**

| <b>EAWWE Item/Subtype</b> | <b>Score</b> | <b>Notes</b>                                                        |
|---------------------------|--------------|---------------------------------------------------------------------|
| 4.3.4                     |              | Words or language seems alive, quasi-physical, strangely powerful   |
| 4.3.5                     |              | Egocentric linguistic reference                                     |
| 4.4                       |              | <i>Unconventional word choice, grammar, tone, cryptic discourse</i> |
| 4.4.1                     |              | Cryptic, telegraphic, ungrammatical speech                          |
| 4.4.2                     |              | Stock words                                                         |
| 4.4.3                     |              | Made-up words (neologisms) or unconventional usage                  |
| 4.4.4                     |              | Mannerisms and stilted speech                                       |
| 4.5                       |              | <i>Disturbed fluency</i>                                            |
| 4.5.1                     |              | Unavailability of words                                             |
| 4.5.2                     |              | Unfocused or disorganized thoughts preclude verbal expression       |
| 4.5.3                     |              | General discordance between intended expression and the expressed   |
| 4.6                       |              | <i>Disturbed relevance</i>                                          |
| 4.6.1                     |              | Derailment*                                                         |
| 4.6.2                     |              | Tangential responding                                               |
| 4.7                       |              | <i>Disturbance of linguistic engagement or purposefulness</i>       |
| 4.7.1                     |              | Aprosody (lack of emotional intonation)*                            |
| 4.7.2                     |              | Echolalia                                                           |

**EAWWE: Examination of Anomalous World Experience**  
**Appendix A (Scoring sheet version)**

| <b>EAWWE Item/Subtype</b> | <b>Score</b> | <b>Notes</b>                                                              |
|---------------------------|--------------|---------------------------------------------------------------------------|
| 4.7.3                     |              | Speech feels autonomous                                                   |
| 4.8                       |              | <i>Anomalous experience of abstract and concrete</i>                      |
| 4.8.1                     |              | Difficulty with or dislike of abstract or general concepts                |
| 4.8.2                     |              | Abstract rendered in concrete terminology                                 |
| 4.8.3                     |              | Specific or concrete meanings rendered in abstract or general terminology |
| 4.8.4                     |              | Hyperabstract or vague discourse                                          |
| 4.9                       |              | <i>Ineffability: Inadequacy of language to describe or express</i>        |
| 4.9.1                     |              | Language inadequate to express unusual experiences*                       |
| 4.9.2                     |              | General feeling of inadequacy of language                                 |
| 4.10                      |              | <i>Alienation from self-description</i>                                   |
| <b>5</b>                  |              | <b>Atmosphere</b>                                                         |
| 5.1                       |              | <i>Derealization of the world</i>                                         |
| 5.1.1                     |              | Remoteness or barrier (plate-glass feeling)*                              |
| 5.1.2                     |              | Decreased intensity or substantiality*                                    |
| 5.1.3                     |              | Deanimation*                                                              |
| 5.1.4                     |              | Falseness                                                                 |
| 5.1.5                     |              | Loss of enticement quality*                                               |
| 5.1.6                     |              | Static quality, stillness, morbid intellectualism                         |

**EAWWE: Examination of Anomalous World Experience**  
**Appendix A (Scoring sheet version)**

| <b>EAWWE Item/Subtype</b> | <b>Score</b> | <b>Notes</b>                                               |
|---------------------------|--------------|------------------------------------------------------------|
| 5.1.7                     |              | Nonspecific/other derealization*                           |
| 5.2                       |              | <i>Loss of affordances</i>                                 |
| 5.3                       |              | <i>Inanimate things seem alive or intentional*</i>         |
| 5.4                       |              | <i>Heightened intensity/hyperrealization*</i>              |
| 5.5                       |              | <i>Déjà vu experiences</i>                                 |
| 5.6                       |              | <i>Jamais vu experiences</i>                               |
| 5.7                       |              | <i>Perplexity</i>                                          |
| 5.7.1                     |              | Confusion of realms                                        |
| 5.7.2                     |              | Unreal interferes                                          |
| 5.7.3                     |              | World experienced as incoherent, disoriented               |
| 5.7.4                     |              | Perplexing hyperawareness of tacit dimension               |
| 5.8                       |              | <i>Anomalous manner of ascribing or perceiving meaning</i> |
| 5.8.1                     |              | Meaning imposed on object by subject                       |
| 5.8.2                     |              | Meaning inherent in object itself                          |
| 5.8.3                     |              | Proliferation of meanings from the object                  |
| 5.9                       |              | <i>Anomalous forms of meaning</i>                          |
| 5.9.1                     |              | Physical or literalist instantiation of abstract meaning   |

**EAWWE: Examination of Anomalous World Experience**  
**Appendix A (Scoring sheet version)**

| <b>EAWWE Item/Subtype</b> | <b>Score</b>                                                     | <b>Notes</b> |
|---------------------------|------------------------------------------------------------------|--------------|
| 5.9.2                     | Anomalous classification                                         |              |
| 5.10                      | <i>Intensified awareness of patterns or trends*</i>              |              |
| 5.11                      | <i>Anomalous sense of causal relationships</i>                   |              |
| 5.11.1                    | Actions or events seem controlled by external force or will      |              |
| 5.11.2                    | Actions or events seem predetermined or planned                  |              |
| 5.12                      | <i>All-inclusive self-consciousness/ontological “paranoia”</i>   |              |
| 5.13                      | <i>Diminished ontological independence of world/subjectivism</i> |              |
| 5.13.1                    | Subjectivism/solipsism                                           |              |
| 5.13.2                    | Double bookkeeping                                               |              |
| 5.13.3                    | Influencing physical reality                                     |              |
| 5.13.4                    | Pseudomovements of objects/persons                               |              |
| 5.14                      | <i>Revelatory or pseudorevelatory (apophanous) mood</i>          |              |
| 5.14.1                    | Uncanny particularity                                            |              |
| 5.14.2                    | Self-referentiality                                              |              |
| 5.14.2.a                  | Paranoid significance*                                           |              |
| 5.14.2.b                  | Grandiose significance                                           |              |
| 5.14.2.c                  | Metaphysical significance                                        |              |

**EAWWE: Examination of Anomalous World Experience**  
**Appendix A (Scoring sheet version)**

| <b>EAWWE Item/Subtype</b> | <b>Score</b>                                                                  | <b>Notes</b> |
|---------------------------|-------------------------------------------------------------------------------|--------------|
| 5.14.2.d                  | Unknown/unstable significance                                                 |              |
| 5.14.3                    | Unspecifiable strangeness                                                     |              |
| 5.15                      | <i>Quasi-mystical experiences</i>                                             |              |
| 5.15.1                    | Mystic union with the world*                                                  |              |
| 5.15.2                    | Mere being                                                                    |              |
| 5.16                      | <i>Experiences of the end of the world</i>                                    |              |
| 5.17                      | <i>Anomalies of mood or affect</i>                                            |              |
| 5.17.1                    | Emptiness, numbness, indifference, lack of spontaneous response to the world* |              |
| 5.17.2                    | Feeling of emotional/affective blockage*                                      |              |
| 5.17.3                    | Pervasive, nameless anxiety with fear of annihilation*                        |              |
| 5.17.4                    | Basic irritation, restlessness, anger*                                        |              |
| 5.17.5                    | Detached euphoria                                                             |              |
| 5.17.6                    | Despair, demoralization, hopelessness*                                        |              |
| 5.17.7                    | Abnormalities of mood constancy*                                              |              |
| 5.17.7.a                  | Mood or emotion is abnormally persistent*                                     |              |
| 5.17.7.b                  | Mood or emotion is abnormally labile*                                         |              |
| 5.17.8                    | Incongruity of mood or emotion                                                |              |

**EAWWE: Examination of Anomalous World Experience**  
**Appendix A (Scoring sheet version)**

| <b>EAWWE Item/Subtype</b> | <b>Score</b> | <b>Notes</b>                                                                       |
|---------------------------|--------------|------------------------------------------------------------------------------------|
| 5.17.8.a                  |              | Mood or emotion inappropriate to current situation                                 |
| 5.17.8.b                  |              | Moods or emotions are mutually contradictory                                       |
| <b>6</b>                  |              | <b>Existential Orientation</b>                                                     |
| 6.1                       |              | <i>Rejection of society or convention</i>                                          |
| 6.1.1                     |              | Disinclination for human society                                                   |
| 6.1.2                     |              | Antagonomia                                                                        |
| 6.1.3                     |              | Idionomia                                                                          |
| 6.2                       |              | <i>Extreme indifference or openness</i>                                            |
| 6.2.1                     |              | Attitude of indifference, insouciance, lack of concern                             |
| 6.2.2                     |              | Conceptual freedom/anything goes                                                   |
| 6.3                       |              | <i>Pervasive disbelief, skepticism, curiosity re the obvious/taken-for-granted</i> |
| 6.4                       |              | <i>Absolute certitude</i>                                                          |
| 6.5                       |              | <i>Feeling of being special or superior</i>                                        |
| 6.5.1                     |              | Feeling of extraordinary insight*                                                  |
| 6.5.2                     |              | Messianic duty*                                                                    |
| 6.5.3                     |              | Intellectual/spiritual grandiosity                                                 |
| 6.6                       |              | <i>Impossible responsibility or guilt*</i>                                         |
| 6.7                       |              | <i>Sense of loss of freedom or individuality</i>                                   |

**EAWWE: Examination of Anomalous World Experience**  
**Appendix A (Scoring sheet version)**

| EAWWE Item/Subtype                                                           | Score | Notes |
|------------------------------------------------------------------------------|-------|-------|
| 6.8 <i>Adherence to abstract, intellectualistic, and/or autonomous rules</i> |       |       |
| 6.9 <i>Existential or intellectual change*</i>                               |       |       |
| 6.10 <i>Feeling of centrality</i>                                            |       |       |
| 6.11 <i>Decentering of self relative to universe</i>                         |       |       |

---

<sup>i</sup> Full reference information:

EAWWE: Sass L, Pienkos E, Škodlar B, Stanghellini G, Fuchs T, Parnas J, Jones N: EAWWE: Examination of Anomalous World Experience. Psychopathology 2017.
